# Supplementary material for: Regional effect on the molecular clock rate of protein evolution in Eutherian and Metatherian genomes
Source: PubMed Central journal article supplement (PMC8336415; doi:10.1186/s12862-021-01882-x), 2021-08-04

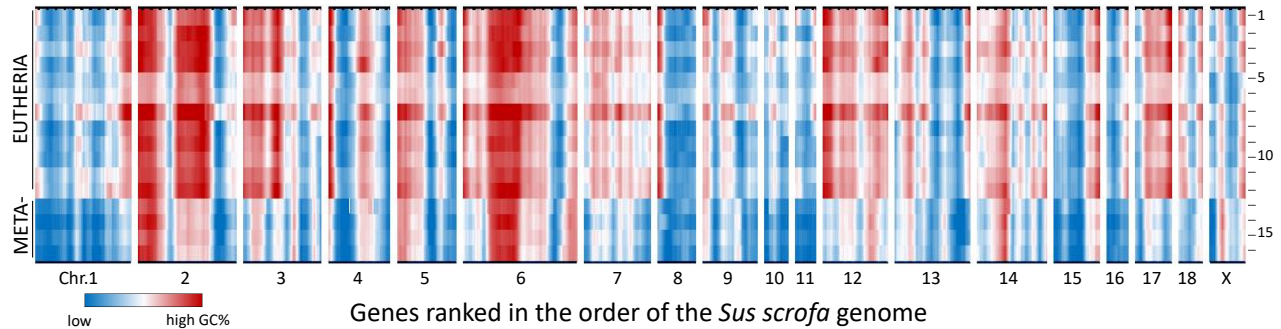

Supplement: 12862_2021_1882_MOESM1_ESM.pdf [file 12862_2021_1882_MOESM1_ESM.pdf]
