# Supplementary material for: Regional effect on the molecular clock rate of protein evolution in Eutherian and Metatherian genomes
Source: PubMed Central journal article supplement (PMC8336415; doi:10.1186/s12862-021-01882-x), 2021-08-04

chr11:1-2,793,519 2,793,519 bp.

enter position, gene symbol, HGVS or search terms

go

chr11 (p15.5) 11p15.4 15.1 p13 11p12 11.2 13.4 q14.1 q21 22.1 q22.3 q23.3 q25

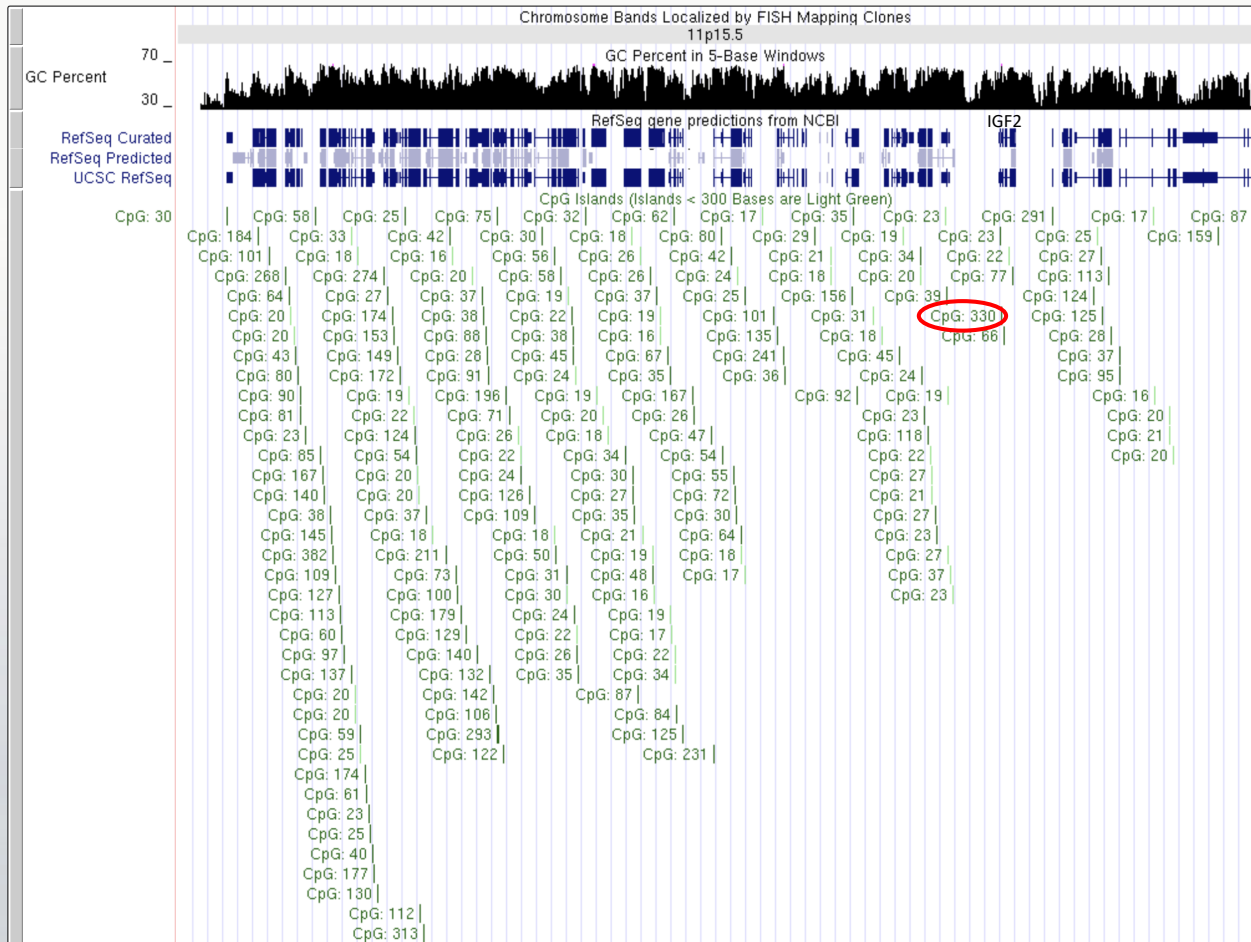

Supplement: 12862_2021_1882_MOESM5_ESM.pdf [file 12862_2021_1882_MOESM5_ESM.pdf]
